# Supplementary material for: Surface velocity of the Northeast Greenland Ice Stream (NEGIS): Assessment of interior velocities derived from satellite data by GPS
Source: Copernicus journal article supplement (doi:10.5194/tc-2020-103), 2020-05-08
Supplement: Supplementary file 2 [file tc-2020-103-supplement.zip]

Archive with 3 entries (3 files):
- MS-Supplementary-Hvidbergetal.pdf
- SupplementaryTableS1.xlsx
- SupplementaryTableS2.xlsx
