# Supplementary material for: Surface velocity of the Northeast Greenland Ice Stream (NEGIS): Assessment of interior velocities derived from satellite data by GPS
Source: Copernicus journal article supplement (doi:10.5194/tc-2020-103), 2020-05-08
Supplement: Supplementary file 2 [file tc-2020-103-supplement.zip › SupplementaryTableS1.xlsx]

## Sheet: Velocities
id	start	end	Nobs	lat	lon	x	y	z	vx	vy	sigmavx	sigmavy
EG-C-000	2015-06-05 17:32:55	2019-03-31 15:24:58	302	75.6267	-35.9803	245335	-1.54555e+06	2704.65	23.5231	51.5726	0.000305808	0.000306301
EG-C-010	2017-08-02 15:17:30	2019-06-28 12:46:45	3	75.6458	-35.9255	246486	-1.54325e+06	2700.52	24.8387	51.1858	0.00505999	0.00488641
EG-C-011	2016-08-04 13:57:52	2017-08-07 18:31:15	3	75.6308	-36.0332	243840	-1.54534e+06	2709.37	23.4346	51.4232	0.00875809	0.00873355
EG-C-012	2015-06-03 12:22:45	2019-06-29 12:32:52	6	75.6124	-36.0379	244029	-1.54736e+06	2712.82	22.4811	51.8013	0.00451451	0.0044566
EG-C-013	2015-06-03 17:20:15	2019-07-04 13:16:15	6	75.6178	-35.9111	247359	-1.54623e+06	2702.88	23.4611	51.4043	0.0044621	0.00446685
EG-C-014	2019-06-29 12:27:30	2019-07-08 14:38:15	2	75.6439	-36.0614	242856	-1.54404e+06	2707.93	24.6717	52.1812	0.4701	0.466826
EG-C-100	2015-06-04 17:02:15	2019-06-28 12:49:37	5	75.7035	-35.7749	249522	-1.53633e+06	2708.72	24.6331	51.48	0.00501696	0.00508323
EG-C-200	2015-06-03 12:30:30	2019-06-29 12:37:18	5	75.5575	-36.193	240763	-1.55398e+06	2733.33	19.4592	50.613	0.0095434	0.00978421
EG-C-500	2016-07-29 21:54:29	2019-06-28 12:45:19	322	75.8124	-35.4558	256088	-1.52311e+06	2666.33	25.2363	52.6296	0.000576642	0.000577159
EG-N-010B	2016-07-25 17:38:15	2019-07-01 12:21:00	6	75.7004	-36.2283	237408	-1.5386e+06	2696.44	18.361	32.6952	0.00357991	0.00357048
EG-N-011	2015-05-26 17:43:45	2019-07-01 12:44:37	5	75.7257	-36.3773	232989	-1.53646e+06	2716.56	9.56531	12.3729	0.00422164	0.00424478
EG-N-012	2015-05-26 15:19:12	2019-07-01 13:13:15	5	75.6892	-36.4814	230794	-1.54085e+06	2700.64	9.04629	12.428	0.00472215	0.00471399
EG-N-013	2015-06-04 19:08:37	2019-07-01 13:22:21	4	75.6636	-36.3329	235209	-1.54302e+06	2704.83	16.5153	30.8621	0.00657001	0.00592386
EG-N-020	2016-07-25 17:47:45	2019-07-01 12:48:45	5	75.6692	-36.2058	238536	-1.54189e+06	2694.39	21.1491	42.587	0.00387092	0.00386379
EG-N-021	2016-07-25 19:16:52	2019-07-01 12:31:45	5	75.6941	-36.3546	234121	-1.5398e+06	2699.28	11.3236	16.8828	0.00387465	0.00387585
EG-N-100	2015-05-26 13:28:45	2019-07-01 13:08:01	4	75.733	-36.5785	227474	-1.53647e+06	2715.3	7.98332	9.30133	0.00460962	0.00414502
EG-S-010	2015-06-02 18:39:00	2019-07-04 12:51:52	8	75.5967	-35.6393	255067	-1.54732e+06	2693.58	21.7442	48.9253	0.00343729	0.00341579
EG-S-011	2015-06-02 20:00:00	2019-07-04 13:10:45	7	75.5702	-35.495	259446	-1.54955e+06	2688.43	5.70684	26.6823	0.0041457	0.00405241
EG-S-012	2015-06-03 17:30:00	2019-07-04 13:38:30	5	75.5338	-35.6	257259	-1.55397e+06	2711.49	5.00871	25.3747	0.00435979	0.00451942
EG-S-013	2015-06-03 17:25:30	2019-07-04 13:50:00	6	75.5603	-35.7445	252872	-1.55175e+06	2715.78	20.7633	47.062	0.00435803	0.0044861
EG-S-021	2016-07-27 16:05:45	2019-07-04 13:19:45	4	75.5382	-35.4745	260582	-1.55293e+06	2712.05	4.07092	24.3742	0.00744142	0.00854831
EG-S-022	2016-07-27 15:30:45	2019-07-04 13:01:15	6	75.5654	-35.6189	256180	-1.55064e+06	2699.93	16.3894	40.8564	0.00379066	0.00380752
EG-S-100	2015-06-02 20:09:45	2019-07-04 13:28:15	4	75.5257	-35.4023	262766	-1.55395e+06	2717.54	3.64323	23.5695	0.00790333	0.00760559
Rx11	2018-07-30 12:29:45	2019-07-03 13:07:30	2	75.6636	-36.9327	219044	-1.5454e+06	2741.5	6.92614	8.39811	0.0232537	0.0173536
Rx12	2018-07-30 14:28:37	2019-07-03 13:12:00	2	75.6799	-36.9968	217065	-1.54387e+06	2742.01	6.7766	7.96885	0.0252179	0.0186777
Rx13	2018-07-30 16:33:07	2019-07-03 13:19:30	2	75.6963	-37.0611	215083	-1.54233e+06	2744.72	6.62992	7.63659	0.0267044	0.0199222
Rx14	2018-07-31 12:37:30	2019-07-03 16:39:00	2	75.7132	-37.1258	213086	-1.54073e+06	2747.39	6.49962	7.40912	0.0242531	0.0197185
Rx15	2018-07-31 12:43:00	2019-07-03 16:44:00	2	75.7287	-37.1885	211169	-1.53927e+06	2750.29	6.37522	7.32567	0.027397	0.0210493
Rx21	2018-07-30 12:44:37	2019-07-03 13:00:22	2	75.6795	-36.8662	220588	-1.54342e+06	2735.62	7.08266	8.56251	0.0232032	0.0177519
Rx22	2018-07-30 14:44:22	2019-07-03 13:34:30	2	75.6957	-36.9308	218600	-1.5419e+06	2737.27	6.85069	8.11957	0.0216161	0.0173508
Rx23	2018-07-30 16:41:30	2019-07-03 13:24:37	2	75.7121	-36.9948	216625	-1.54036e+06	2741.34	6.73603	7.79661	0.0289352	0.0215909
Rx24	2018-07-31 12:31:22	2019-07-03 16:34:15	2	75.7283	-37.0589	214656	-1.53883e+06	2743.16	6.58585	7.58018	0.022981	0.0188884
Rx25	2018-07-31 12:49:15	2019-07-03 16:52:15	2	75.7448	-37.1237	212668	-1.53728e+06	2745.32	6.40955	7.40563	0.0274217	0.0241018
Rx31	2018-07-30 12:56:15	2019-07-03 12:54:15	2	75.6952	-36.801	222100	-1.54145e+06	2732.05	7.30325	8.69575	0.0193731	0.0157786
Rx32	2018-07-30 14:57:22	2019-07-03 13:39:15	2	75.7115	-36.8649	220127	-1.53992e+06	2734.32	7.08736	8.18915	0.0247353	0.0185482
Rx33	2018-07-30 16:49:15	2019-07-03 15:17:00	2	75.7279	-36.9289	218154	-1.53839e+06	2736.82	6.79252	7.93811	0.0166184	0.0210162
Rx34	2018-07-31 12:26:30	2019-07-03 16:27:52	2	75.7442	-36.9929	216184	-1.53686e+06	2738.16	6.59348	7.74538	0.0223496	0.0179136
Rx41	2018-07-30 13:08:15	2019-07-03 14:49:00	2	75.7109	-36.7349	223630	-1.53949e+06	2726.64	7.53686	8.81334	0.0153572	0.0163154
Rx42	2018-07-30 15:10:00	2019-07-03 14:45:45	2	75.7273	-36.7982	221671	-1.53795e+06	2730.4	7.22527	8.34116	0.0137857	0.0149626
Rx43	2018-07-30 16:58:07	2019-07-03 15:09:30	2	75.744	-36.8631	219670	-1.53638e+06	2731.73	6.88181	8.07726	0.0171776	0.0205767
Rx44	2018-07-31 12:19:30	2019-07-03 17:20:00	2	75.76	-36.9265	217722	-1.53488e+06	2734.58	6.70806	7.91336	0.0193849	0.0175274
Rx45	2018-07-31 12:59:45	2019-07-03 17:14:37	2	75.7764	-36.9909	215746	-1.53334e+06	2733.4	6.40039	7.806	0.0276505	0.0251309
Rx51	2018-07-30 13:20:00	2019-07-03 14:55:07	2	75.7266	-36.6682	225170	-1.53752e+06	2719.51	7.74164	8.85631	0.0146968	0.0162065
Rx52	2018-07-30 15:23:07	2019-07-03 15:00:07	2	75.7431	-36.7322	223193	-1.53597e+06	2725.72	7.3258	8.48122	0.0150163	0.017104
Rx53	2018-07-30 17:06:07	2019-07-03 15:06:22	2	75.7595	-36.7959	221229	-1.53444e+06	2727.2	6.98719	8.23462	0.0164242	0.0206687
Rx54	2018-07-31 14:46:30	2019-07-02 16:43:00	2	75.7758	-36.8601	219254	-1.53291e+06	2728.07	6.01342	8.02002	0.0228694	0.0205975
Rx63	2018-07-30 17:13:37	2019-07-02 15:36:15	2	75.7753	-36.7295	222756	-1.53247e+06	2725.21	7.03616	8.44661	0.0148992	0.0170998
Rx64	2018-07-31 14:42:22	2019-07-02 16:49:07	2	75.7917	-36.7937	220782	-1.53093e+06	2724.23	6.71524	8.26256	0.0218029	0.0203182
Rx65	2018-07-31 14:13:00	2019-07-02 16:32:45	2	75.808	-36.8582	218804	-1.5294e+06	2723.1	6.50488	8.05077	0.0240545	0.0191578
Rx71	2018-07-30 13:44:00	2019-07-02 12:46:30	2	75.7581	-36.5349	228240	-1.53357e+06	2721.87	7.83054	9.44166	0.0215555	0.0186053
Rx72	2018-07-30 15:47:30	2019-07-02 13:16:15	2	75.7746	-36.5988	226263	-1.53203e+06	2724.43	7.39372	9.06547	0.0252945	0.0189105
Rx73	2018-07-30 17:22:00	2019-07-02 15:40:15	2	75.791	-36.6628	224289	-1.5305e+06	2722.31	7.13869	8.77814	0.0173368	0.0205113
Rx74	2018-07-31 14:35:45	2019-07-02 16:23:15	2	75.8074	-36.7268	222321	-1.52896e+06	2721.79	6.84949	8.58984	0.0209315	0.0203979
Rx75	2018-07-31 14:20:30	2019-07-02 16:28:45	2	75.824	-36.7917	220330	-1.52741e+06	2719.49	6.57901	8.35046	0.0199356	0.0190767
Rx81	2018-07-31 16:23:22	2019-07-02 12:52:45	2	75.7739	-36.4679	229776	-1.53159e+06	2719.13	8.06858	10.2887	0.0280652	0.0320643
Rx82	2018-07-31 16:30:45	2019-07-02 13:10:45	2	75.7903	-36.5319	227798	-1.53005e+06	2717.32	7.65963	9.73284	0.028344	0.0272527
Rx84	2018-07-31 14:31:00	2019-07-02 15:14:30	2	75.8232	-36.6603	223842	-1.52698e+06	2710.18	6.97302	8.92692	0.0167494	0.0199846
Rx85	2018-07-31 14:24:37	2019-07-02 15:09:15	2	75.8396	-36.7245	221874	-1.52545e+06	2707.89	6.75127	8.60727	0.0162974	0.0204985
Rx91	2018-07-31 16:20:15	2019-07-02 12:58:00	2	75.7894	-36.401	231306	-1.52962e+06	2697.71	8.04042	11.1538	0.0278803	0.0260003
Rx92	2018-07-31 16:13:45	2019-07-02 13:05:00	2	75.8061	-36.4647	229333	-1.52807e+06	2694.2	7.61484	10.2409	0.0288594	0.0257147
Rx93	2018-07-31 16:10:00	2019-07-02 14:54:07	2	75.8225	-36.5289	227355	-1.52654e+06	2693.11	7.22535	9.56674	0.0190012	0.0214811
Rx94	2018-07-31 16:03:45	2019-07-02 14:59:45	2	75.8389	-36.5931	225382	-1.52501e+06	2692.31	6.90522	9.03335	0.0201111	0.0218104
Rx95	2018-07-31 15:59:07	2019-07-02 15:05:30	2	75.8553	-36.6574	223409	-1.52348e+06	2694.19	6.67522	8.65281	0.0192835	0.0208536
