# Supplementary material for: Surface velocity of the Northeast Greenland Ice Stream (NEGIS): Assessment of interior velocities derived from satellite data by GPS
Source: Copernicus journal article supplement (doi:10.5194/tc-2020-103), 2020-05-08
Supplement: Supplementary file 2 [file tc-2020-103-supplement.zip › SupplementaryTableS2.xlsx]

## Sheet: Sheet1
folder	file	t_start	t_end	dt	bias	rms	smooth_L	smooth_rms	bias_vx	bias_vy	resolution
DTU-Space	negis_insar_v2_20190101_20190118_vx.tif	2019-01-01	2019-01-18	0.0465435	0.352026	0.548307	353.973	0.526828	-0.243411	-0.25431	50
ENVEO	Greenland_iv_250m_s1_all_v20190412_vx.tif	2014-10-01	2019-04-12 23:59:59	4.52841	1.28267	0.713517	593.749	0.592897	1.20059	0.451472	250
ENVEO	greenland_iv_250m_s1_s20141001_e20150930_v1_1_vx.tif	2014-10-01	2015-09-30	0.996578	2.0622	6.41893	3107.57	3.16673	-0.559933	1.98473	250
ENVEO	greenland_iv_250m_s1_s20151001_e20160930_v1_1_vx.tif	2015-10-01	2016-09-30	0.999316	0.425597	1.94498	1185.38	1.11068	0.423486	-0.0423402	250
ENVEO	greenland_iv_250m_s1_s20161001_e20170930_v1_1_vx.tif	2016-10-01	2017-09-30	0.996578	1.56016	1.3626	904.022	0.960401	1.38344	0.721247	250
ENVEO	greenland_iv_250m_s1_s20171001_e20180930_v1_1_vx.tif	2017-10-01	2018-09-30	0.996578	1.27869	1.17631	816.011	0.72802	1.16983	0.51627	250
ITS_LIVE	GRE_G0120_0000_vx.tif	1985-01-01	2018-12-31 23:59:59	33.9959	0.467395	0.880819	380.929	0.848461	0.423406	-0.197952	120
ITS_LIVE	GRE_G0240_2013_vx.tif	2013-01-01	2013-12-31 23:59:59	0.996578	2.01819	3.3847	537.4	3.38204	-2.00574	0.223819	240
ITS_LIVE	GRE_G0240_2014_vx.tif	2014-01-01	2014-12-31 23:59:59	0.996578	1.03752	1.75308	840.626	1.67617	-0.551329	-0.878906	240
ITS_LIVE	GRE_G0240_2015_vx.tif	2015-01-01	2015-12-31 23:59:59	0.996578	0.847844	1.73915	898.267	1.70907	0.609455	-0.58941	240
ITS_LIVE	GRE_G0240_2016_vx.tif	2016-01-01	2016-12-31 23:59:59	0.999316	0.472964	1.18627	548.558	1.16431	0.284325	-0.37796	240
ITS_LIVE	GRE_G0240_2017_vx.tif	2017-01-01	2017-12-31 23:59:59	0.996578	0.647404	1.01935	648.442	0.983645	0.641806	-0.0849579	240
ITS_LIVE	GRE_G0240_2018_vx.tif	2018-01-01	2018-12-31 23:59:59	0.996578	0.645198	0.954738	50.9034	0.954738	0.639072	-0.0886965	240
ITS_LIVE	vx_2013-2018.tif	2013-01-01	2018-12-31 23:59:59	5.99589	0.306062	0.866842	27.335	0.866842	-0.0637351	-0.299352	240
MEaSUREs\M InSAR v2	greenland_vel_mosaic500_2000_2001_vx_v02.1.tif	2000-09-03	2001-01-24 23:59:59	0.391513	3.78225	3.0769	1908.46	2.25167	-1.68359	-3.38688	500
MEaSUREs\M InSAR v2	greenland_vel_mosaic500_2005_2006_vx_v02.1.tif	2005-12-13	2006-04-20 23:59:59	0.350445	0.538686	1.99926	1098.57	1.49692	-0.273253	-0.464237	500
MEaSUREs\M InSAR v2	greenland_vel_mosaic500_2006_2007_vx_v02.1.tif	2006-12-18	2007-06-06 23:59:59	0.465435	1.28539	1.67728	947.055	1.56505	-0.60643	1.13334	500
MEaSUREs\M InSAR v2	greenland_vel_mosaic500_2007_2008_vx_v02.1.tif	2007-09-07	2008-04-23 23:59:59	0.626968	0.70869	1.38382	1014.86	1.04796	-0.672426	0.223798	500
MEaSUREs\M InSAR v2	greenland_vel_mosaic500_2008_2009_vx_v02.1.tif	2008-09-15	2009-06-16 23:59:59	0.750171	0.890984	0.458783	51.0748	0.458783	-0.815028	-0.359975	500
MEaSUREs\M InSAR v2	greenland_vel_mosaic500_2009_2010_vx_v02.1.tif	2009-09-02	2010-04-05 23:59:59	0.588638	1.60643	2.86301	1531.36	2.73977	-1.60119	-0.129626	500
MEaSUREs\M InSAR v2	greenland_vel_mosaic500_2012_2013_vx_v02.1.tif	2012-11-10	2013-04-05 23:59:59	0.399726	0.984051	1.3203	925.049	1.12916	-0.886005	-0.428194	500
MEaSUREs\M InSAR v2	greenland_vel_mosaic500_2014_2015_vx_v02.1.tif	2014-09-01	2015-05-31 23:59:59	0.744695	2.56161	6.13357	4277.29	3.76167	-0.526186	2.50699	500
MEaSUREs\M InSAR v2	greenland_vel_mosaic500_2016_2017_vx_v02.1.tif	2016-09-01	2017-05-31 23:59:59	0.744695	0.666438	2.39884	1374.8	1.68453	-0.591136	-0.30773	500
MEaSUREs\M InSAR v2	greenland_vel_mosaic500_2017_2018_vx_v02.1.tif	2017-09-01	2018-05-31 23:59:59	0.744695	0.712282	2.18725	1354.38	1.63601	-0.663488	0.259093	500
MEaSUREs\M InSAR v2	vx_2000-2018.tif	2000-09-03	2018-05-31 23:59:59	17.7385	0.837319	0.976513	678.694	0.859555	-0.831873	-0.0953425	500
MEaSUREs\M InSAR v2 200m	greenland_vel_mosaic200_2014_2015_vx_v02.1.tif	2014-09-01	2015-05-31 23:59:59	0.744695	1.31686	4.78713	2766.79	3.19823	-0.814793	1.03452	200
MEaSUREs\M InSAR v2 200m	greenland_vel_mosaic200_2015_2016_vx_v02.1.tif	2015-09-01	2016-05-31 23:59:59	0.747433	1.65698	2.15512	1546.94	1.88184	-1.00599	-1.31665	200
MEaSUREs\M InSAR v2 200m	greenland_vel_mosaic200_2016_2017_vx_v02.1.tif	2016-09-01	2017-05-31 23:59:59	0.744695	0.62562	2.40609	1262.49	1.5458	-0.600786	0.174518	200
MEaSUREs\M InSAR v2 200m	greenland_vel_mosaic200_2017_2018_vx_v02.1.tif	2017-09-01	2018-05-31 23:59:59	0.744695	0.755346	2.29277	1216.37	1.55581	-0.688975	0.309614	200
MEaSUREs\M InSAR v2 200m	vx2014-2018.tif	2014-09-01	2018-05-31 23:59:59	3.74538	0.779275	1.72793	917.235	1.30176	-0.777637	0.0505007	200
MEaSUREs\M Multi-year IV mosaic v1	greenland_vel_mosaic250_vx_v1.tif	1995-01-12	2015-10-31 23:59:59	20.7995	0.767592	0.495511	202.481	0.480251	-0.745652	-0.182208	250
MEaSUREs\M SAR and Landsat v1	greenland_vel_mosaic500_2015_vx_v1.tif	2014-12-01	2015-11-30 23:59:59	0.996578	0.327236	1.84542	1224.23	1.65143	0.0716144	0.319303	500
MEaSUREs\M SAR and Landsat v1	greenland_vel_mosaic500_2016_vx_v1.tif	2015-12-01	2016-11-30 23:59:59	0.999316	1.05882	1.05223	640.094	0.949999	-0.764207	0.732863	500
MEaSUREs\M SAR and Landsat v1	greenland_vel_mosaic500_2017_vx_v01.tif	2016-12-01	2017-11-30 23:59:59	0.996578	0.886324	0.981037	553.345	0.873416	-0.842558	-0.275076	500
MEaSUREs\M SAR and Landsat v1	greenland_vel_mosaic500_2018_vx_v01.tif	2017-12-01	2018-11-30 23:59:59	0.996578	0.530117	1.5294	800.616	1.29482	-0.529665	0.0218878	500
MEaSUREs\M SAR and Landsat v1	vx_2015-2018.tif	2014-12-01	2018-11-30 23:59:59	3.99726	0.553502	0.697714	379.913	0.674805	-0.516204	0.199745	500
MEaSUREs\M SAR and Landsat v1\M Quarterly SAR and Landsat V1	greenland_vel_mosaic_2014-12-01_2015-02-28_vx_v01.tif	2014-12-01	2015-02-28	0.243669	2.74929	6.71425	4574.99	3.9284	-0.536939	2.69635	200
MEaSUREs\M SAR and Landsat v1\M Quarterly SAR and Landsat V1	greenland_vel_mosaic_2015-03-01_2015-05-31_vx_v01.tif	2015-03-01	2015-05-31	0.249144	2.07367	7.56475	2722.71	4.23165	-1.54925	-1.37838	200
MEaSUREs\M SAR and Landsat v1\M Quarterly SAR and Landsat V1	greenland_vel_mosaic_2015-06-01_2015-08-31_vx_v01.tif	2015-06-01	2015-08-31	0.249144	1.68529	3.07604	2168.25	2.52196	1.36856	0.983497	200
MEaSUREs\M SAR and Landsat v1\M Quarterly SAR and Landsat V1	greenland_vel_mosaic_2015-12-01_2016-02-29_vx_v01.tif	2015-12-01	2016-02-29	0.246407	0.786076	2.79598	1901.18	1.88468	-0.689355	-0.377764	200
MEaSUREs\M SAR and Landsat v1\M Quarterly SAR and Landsat V1	greenland_vel_mosaic_2016-03-01_2016-05-31_vx_v01.tif	2016-03-01	2016-05-31	0.249144	1.29429	1.75627	1011.17	1.37798	-1.18268	0.525781	200
MEaSUREs\M SAR and Landsat v1\M Quarterly SAR and Landsat V1	greenland_vel_mosaic_2016-06-01_2016-08-31_vx_v01.tif	2016-06-01	2016-08-31	0.249144	1.57609	1.43206	857.508	1.10838	-0.451498	1.51003	200
MEaSUREs\M SAR and Landsat v1\M Quarterly SAR and Landsat V1	greenland_vel_mosaic_2016-09-01_2016-11-30_vx_v01.tif	2016-09-01	2016-11-30	0.246407	0.562594	6.30136	1945.2	2.32573	-0.562579	0.00415719	200
MEaSUREs\M SAR and Landsat v1\M Quarterly SAR and Landsat V1	greenland_vel_mosaic_2017-12-01_2018-02-28_vx_v01.tif	2017-12-01	2018-02-28	0.243669	0.764555	2.52041	1229.9	1.89426	-0.543849	-0.537376	200
MEaSUREs\M SAR and Landsat v1\M Quarterly SAR and Landsat V1	greenland_vel_mosaic_2018-03-01_2018-05-31_vx_v01.tif	2018-03-01	2018-05-31	0.249144	0.783816	1.67524	863.341	1.21208	-0.410444	-0.667759	200
MEaSUREs\M SAR and Landsat v1\M Quarterly SAR and Landsat V1	greenland_vel_mosaic_2018-06-01_2018-08-31_vx_v01.tif	2018-06-01	2018-08-31	0.249144	1.02569	1.51425	990.855	1.15186	-0.488057	0.902126	200
MEaSUREs\M SAR and Landsat v1\M Quarterly SAR and Landsat V1	greenland_vel_mosaic_2018-09-01_2018-11-30_vx_v01.tif	2018-09-01	2018-11-30	0.246407	0.647452	2.74816	1194.33	1.17184	-0.575487	-0.296662	200
MEaSUREs\M SAR and Landsat v1\M Quarterly SAR and Landsat V1	greenland_vel_mosiac_2016-12-01_2017-02-28_vx_v01.tif	2016-12-01	2017-02-28	0.243669	1.16874	2.63265	1375.07	1.23008	-0.317222	1.12487	200
MEaSUREs\M SAR and Landsat v1\M Quarterly SAR and Landsat V1	greenland_vel_mosiac_2017-03-01_2017-05-31_vx_v01.tif	2017-03-01	2017-05-31	0.249144	1.00961	1.53431	803.834	1.20705	-0.905588	-0.446338	200
MEaSUREs\M SAR and Landsat v1\M Quarterly SAR and Landsat V1	greenland_vel_mosiac_2017-06-01_2017-08-31_vx_v01.tif	2017-06-01	2017-08-31	0.249144	1.25642	1.93654	847.92	1.559	-0.989895	-0.773754	200
MEaSUREs\M SAR and Landsat v1\M Quarterly SAR and Landsat V1	greenland_vel_mosiac_2017-09-01_2017-11-30_vx_v01.tif	2017-09-01	2017-11-30	0.246407	2.97419	4.26797	2077.73	2.42774	-0.847922	2.85076	200
PROMICE	gris_offsetTracking_20160914_20190617_vx.tif	2016-09-14	2019-06-17	2.75428	1.00032	0.738214	448.829	0.625834	-0.530102	-0.848309	500
PROMICE	IV_20160913_20161006_vx.tif	2016-09-14	2016-10-06	0.0602327	2.55126	21.3037	2812.51	3.6901	2.468	-0.646482	500
PROMICE	IV_20160925_20161018_vx.tif	2016-09-25	2016-10-18	0.0629706	27.4732	9.94305	3187.48	2.88804	-9.00169	-25.9566	500
PROMICE	IV_20161007_20161030_vx.tif	2016-10-07	2016-10-30	0.0629706	12.8124	8.53792	2937.49	2.74692	-2.67953	-12.5291	500
PROMICE	IV_20161013_20161105_vx.tif	2016-10-13	2016-11-05	0.0629706	21.6824	22.3647	4937.49	6.03077	14.9093	15.7429	500
PROMICE	IV_20161031_20161123_vx.tif	2016-10-31	2016-11-23	0.0629706	23.9733	13.8879	3937.49	3.84181	-13.9005	-19.532	500
PROMICE	IV_20161106_20161129_vx.tif	2016-11-06	2016-11-29	0.0629706	3.06904	11.2014	4312.49	4.60486	3.06897	-0.0209134	500
PROMICE	IV_20161130_20161223_vx.tif	2016-11-30	2016-12-23	0.0629706	5.28548	4.97676	1865.11	2.20917	1.78048	4.97657	500
PROMICE	IV_20161206_20161229_vx.tif	2016-12-06	2016-12-29	0.0629706	2.8631	4.79258	1558.08	1.98052	-0.343597	2.84241	500
PROMICE	IV_20161212_20170104_vx.tif	2016-12-12	2017-01-04	0.0629706	5.64183	7.05805	1756.9	2.92901	5.4755	1.35984	500
PROMICE	IV_20161218_20170110_vx.tif	2016-12-18	2017-01-10	0.0629706	22.267	10.2106	3097.02	3.16089	-14.3873	-16.9949	500
PROMICE	IV_20161224_20170116_vx.tif	2016-12-24	2017-01-16	0.0629706	15.4954	8.61287	3372.24	5.7673	6.9704	13.8392	500
PROMICE	IV_20161230_20170122_vx.tif	2016-12-30	2017-01-22	0.0629706	3.37213	4.18625	1581.09	1.64856	1.98447	2.72639	500
PROMICE	IV_20170105_20170128_vx.tif	2017-01-05	2017-01-28	0.0629706	4.55685	4.58591	1671.35	1.74818	2.83757	3.56554	500
PROMICE	IV_20170111_20170203_vx.tif	2017-01-11	2017-02-03	0.0629706	10.6945	9.2381	3937.49	3.77135	-10.3163	-2.81888	500
PROMICE	IV_20170117_20170209_vx.tif	2017-01-17	2017-02-09	0.0629706	7.29174	5.31873	2437.49	2.07656	-5.86304	-4.33523	500
PROMICE	IV_20170123_20170215_vx.tif	2017-01-23	2017-02-15	0.0629706	8.61719	3.79361	1871.06	1.99518	-6.5868	-5.55609	500
PROMICE	IV_20170129_20170221_vx.tif	2017-01-29	2017-02-21	0.0629706	3.46428	4.26228	2032.94	2.5184	3.36558	0.821051	500
PROMICE	IV_20170204_20170227_vx.tif	2017-02-04	2017-02-27	0.0629706	2.3755	5.63174	1821.4	1.96872	-2.30504	-0.5743	500
PROMICE	IV_20170210_20170305_vx.tif	2017-02-10	2017-03-05	0.0629706	7.40787	5.33386	1857.05	2.10183	-2.77474	6.86858	500
PROMICE	IV_20170216_20170311_vx.tif	2017-02-16	2017-03-11	0.0629706	7.21528	4.84224	1929.47	2.22232	-7.19217	0.577054	500
PROMICE	IV_20170222_20170317_vx.tif	2017-02-22	2017-03-17	0.0629706	3.93897	4.24411	2112.32	2.26374	3.10851	-2.41923	500
PROMICE	IV_20170228_20170323_vx.tif	2017-02-28	2017-03-23	0.0629706	2.86016	4.1384	2035.44	2.20508	2.74796	-0.793247	500
PROMICE	IV_20170306_20170329_vx.tif	2017-03-06	2017-03-29	0.0629706	5.60654	4.34023	1757.29	2.18971	4.54705	3.27988	500
PROMICE	IV_20170312_20170404_vx.tif	2017-03-12	2017-04-04	0.0629706	3.54317	4.97688	1902.14	1.57689	-2.78334	-2.1925	500
PROMICE	IV_20170318_20170410_vx.tif	2017-03-18	2017-04-10	0.0629706	8.84418	6.07984	2214.44	3.09031	1.22052	8.75955	500
PROMICE	IV_20170324_20170416_vx.tif	2017-03-24	2017-04-16	0.0629706	3.43542	5.11476	1973.95	2.5613	-3.43302	0.128317	500
PROMICE	IV_20170330_20170422_vx.tif	2017-03-30	2017-04-22	0.0629706	2.37402	3.52551	1417.13	1.85383	-0.24648	2.36119	500
PROMICE	IV_20170405_20170428_vx.tif	2017-04-05	2017-04-28	0.0629706	3.10417	3.7383	1501.61	2.06483	-2.21	-2.17985	500
PROMICE	IV_20170411_20170504_vx.tif	2017-04-11	2017-05-04	0.0629706	3.41322	3.6707	1752.16	1.64833	0.354443	3.39476	500
PROMICE	IV_20170417_20170510_vx.tif	2017-04-17	2017-05-10	0.0629706	10.4207	4.3341	1457.6	2.32664	-7.4117	-7.32511	500
PROMICE	IV_20170423_20170516_vx.tif	2017-04-23	2017-05-16	0.0629706	11.6027	7.70861	2139.57	2.67708	-8.12073	-8.28714	500
PROMICE	IV_20170429_20170522_vx.tif	2017-04-29	2017-05-22	0.0629706	11.983	7.07238	2001.82	3.34261	-3.35822	-11.5028	500
PROMICE	IV_20170505_20170528_vx.tif	2017-05-05	2017-05-28	0.0629706	8.09641	4.49389	1979.82	2.61791	7.20264	3.69781	500
PROMICE	IV_20170511_20170603_vx.tif	2017-05-11	2017-06-03	0.0629706	3.07204	4.94474	2937.51	2.72892	-1.96584	2.3607	500
PROMICE	IV_20170517_20170609_vx.tif	2017-05-17	2017-06-09	0.0629706	7.86834	3.0647	1875.25	1.96074	2.02015	7.60459	500
PROMICE	IV_20170523_20170615_vx.tif	2017-05-23	2017-06-15	0.0629706	8.84528	4.35914	1902.41	2.27741	2.35274	8.52664	500
PROMICE	IV_20170529_20170621_vx.tif	2017-05-29	2017-06-21	0.0629706	17.2229	7.55913	2437.38	5.21445	12.0948	12.2616	500
PROMICE	IV_20170604_20170627_vx.tif	2017-06-04	2017-06-27	0.0629706	9.35159	6.12132	3312.49	3.62079	-1.14073	-9.28175	500
PROMICE	IV_20170610_20170703_vx.tif	2017-06-10	2017-07-03	0.0629706	7.45455	4.02169	2437.49	2.35378	0.319496	-7.4477	500
PROMICE	IV_20170616_20170709_vx.tif	2017-06-16	2017-07-09	0.0629706	5.53226	5.01319	2437.5	3.55199	-1.53503	-5.31504	500
PROMICE	IV_20170622_20170715_vx.tif	2017-06-22	2017-07-15	0.0629706	6.59519	4.17107	1718.87	1.6888	3.43533	5.62983	500
PROMICE	IV_20170628_20170721_vx.tif	2017-06-28	2017-07-21	0.0629706	0.732338	4.39482	1781.17	2.13341	0.711267	-0.174409	500
PROMICE	IV_20170704_20170727_vx.tif	2017-07-04	2017-07-27	0.0629706	3.24193	5.22685	2437.5	2.53939	3.21004	0.453545	500
PROMICE	IV_20170710_20170802_vx.tif	2017-07-10	2017-08-02	0.0629706	29.3264	5.79425	2506.41	3.13228	-15.2451	-25.0524	500
PROMICE	IV_20170716_20170808_vx.tif	2017-07-16	2017-08-08	0.0629706	13.9607	8.1686	2937.49	4.28212	-9.53492	-10.1974	500
PROMICE	IV_20170722_20170814_vx.tif	2017-07-22	2017-08-14	0.0629706	18.3567	7.4046	2937.48	3.85149	-11.4354	-14.3597	500
PROMICE	IV_20170728_20170820_vx.tif	2017-07-28	2017-08-20	0.0629706	9.45849	8.89378	3312.5	3.49714	-7.04205	-6.31447	500
PROMICE	IV_20170803_20170826_vx.tif	2017-08-03	2017-08-26	0.0629706	22.5465	8.61813	2687.49	3.16266	-14.5306	-17.2396	500
PROMICE	IV_20170809_20170901_vx.tif	2017-08-09	2017-09-01	0.0629706	3.83692	5.21851	2437.49	3.66981	-3.72337	-0.92653	500
PROMICE	IV_20170815_20170907_vx.tif	2017-08-15	2017-09-07	0.0629706	5.37978	5.99781	2687.49	4.20824	-4.68333	-2.64735	500
PROMICE	IV_20170821_20170913_vx.tif	2017-08-21	2017-09-13	0.0629706	21.5587	10.3298	3937.5	7.27154	10.8902	18.6059	500
PROMICE	IV_20170902_20170925_vx.tif	2017-09-02	2017-09-25	0.0629706	4.08522	6.54295	3187.49	3.49995	-2.38415	-3.31736	500
PROMICE	IV_20170908_20171001_vx.tif	2017-09-08	2017-10-01	0.0629706	14.3733	6.73088	1878.11	2.11716	-6.55569	-12.7912	500
PROMICE	IV_20170914_20171007_vx.tif	2017-09-14	2017-10-07	0.0629706	11.4454	17.1603	2874.77	2.58675	-4.87426	-10.3556	500
PROMICE	IV_20170920_20171013_vx.tif	2017-09-20	2017-10-13	0.0629706	9.68439	18.8772	2907.52	5.79312	-9.25519	-2.85109	500
PROMICE	IV_20170926_20171019_vx.tif	2017-09-26	2017-10-19	0.0629706	33.7583	11.8034	3655.54	9.56456	16.7084	29.3335	500
PROMICE	IV_20171002_20171025_vx.tif	2017-10-02	2017-10-25	0.0629706	14.0854	8.26562	2687.48	4.59397	6.71947	12.3794	500
PROMICE	IV_20171008_20171031_vx.tif	2017-10-08	2017-10-31	0.0629706	14.8899	7.13752	2437.5	3.74358	8.54109	12.1967	500
PROMICE	IV_20171014_20171106_vx.tif	2017-10-14	2017-11-06	0.0629706	4.77924	7.96877	2073.46	2.57929	-3.08874	-3.64702	500
PROMICE	IV_20171020_20171112_vx.tif	2017-10-20	2017-11-12	0.0629706	9.37173	8.16186	3312.49	3.09355	6.08368	7.12869	500
PROMICE	IV_20171026_20171118_vx.tif	2017-10-26	2017-11-18	0.0629706	2.03134	6.61786	3187.5	3.27307	0.973596	1.78282	500
PROMICE	IV_20171101_20171124_vx.tif	2017-11-01	2017-11-24	0.0629706	5.91508	6.22796	2937.5	2.98064	2.37398	5.41779	500
PROMICE	IV_20171106_20171130_vx.tif	2017-11-06	2017-11-30	0.0657084	7.31039	6.90307	2937.5	3.8431	-5.07215	-5.26451	500
PROMICE	IV_20171118_20171212_vx.tif	2017-11-18	2017-12-12	0.0657084	5.45971	7.05673	2015.04	2.41072	0.0537072	-5.45945	500
PROMICE	IV_20171130_20171224_vx.tif	2017-11-30	2017-12-24	0.0657084	7.76663	5.0425	2253.21	2.70195	-1.68606	-7.58141	500
PROMICE	IV_20171212_20180105_vx.tif	2017-12-12	2018-01-05	0.0657084	3.30138	4.00445	1680.55	1.85117	-2.48106	2.17796	500
PROMICE	IV_20171224_20180117_vx.tif	2017-12-24	2018-01-17	0.0657084	2.11504	3.62465	1895.4	2.32408	-1.01163	-1.85742	500
PROMICE	IV_20180105_20180129_vx.tif	2018-01-05	2018-01-29	0.0657084	4.71277	9.49941	6220.59	5.8895	-3.28549	-3.37871	500
PROMICE	IV_20180117_20180210_vx.tif	2018-01-17	2018-02-10	0.0657084	0.458396	5.39343	2264.32	2.60027	-0.449278	0.0909739	500
PROMICE	IV_20180129_20180222_vx.tif	2018-01-29	2018-02-22	0.0657084	7.55086	11.379	3437.49	4.94529	-3.93734	-6.44305	500
PROMICE	IV_20180210_20180306_vx.tif	2018-02-10	2018-03-06	0.0657084	15.8224	9.59093	3187.49	3.34176	-11.3989	-10.9733	500
PROMICE	IV_20180222_20180318_vx.tif	2018-02-22	2018-03-18	0.0657084	10.4974	6.51155	3312.5	3.17315	1.18546	-10.4302	500
PROMICE	IV_20180306_20180330_vx.tif	2018-03-06	2018-03-30	0.0657084	13.4034	3.73506	1761.98	2.0617	-6.22278	-11.8714	500
PROMICE	IV_20180318_20180411_vx.tif	2018-03-18	2018-04-11	0.0657084	9.2397	5.09392	1754.32	2.46903	-5.318	-7.55585	500
PROMICE	IV_20180411_20180505_vx.tif	2018-04-11	2018-05-05	0.0657084	40.3302	9.10874	2687.5	3.04622	-14.1872	-37.7525	500
PROMICE	IV_20180423_20180517_vx.tif	2018-04-23	2018-05-17	0.0657084	32.595	11.0625	3312.5	4.82622	-12.8792	-29.9426	500
PROMICE	IV_20180505_20180529_vx.tif	2018-05-05	2018-05-29	0.0657084	41.8	18.9553	7687.52	7.77342	19.7663	36.8312	500
PROMICE	IV_20180517_20180610_vx.tif	2018-05-17	2018-06-10	0.0657084	4.14311	4.9574	1968.25	1.99396	-1.35052	-3.91682	500
PROMICE	IV_20180529_20180622_vx.tif	2018-05-29	2018-06-22	0.0657084	13.5259	6.37205	1867.62	2.08432	-4.59765	-12.7205	500
PROMICE	IV_20180610_20180704_vx.tif	2018-06-10	2018-07-04	0.0657084	3.96824	4.9049	1535.94	2.22746	-3.59342	-1.68352	500
PROMICE	IV_20180622_20180716_vx.tif	2018-06-22	2018-07-16	0.0657084	3.10811	6.57781	2437.5	2.39034	3.08878	-0.346099	500
PROMICE	IV_20180704_20180728_vx.tif	2018-07-04	2018-07-28	0.0657084	7.03801	9.43107	3687.51	3.33152	-2.21839	-6.67925	500
PROMICE	IV_20180716_20180809_vx.tif	2018-07-16	2018-08-09	0.0657084	6.77551	6.20399	2687.5	2.77999	-6.4166	-2.17596	500
PROMICE	IV_20180728_20180821_vx.tif	2018-07-28	2018-08-21	0.0657084	9.12084	7.5788	2937.49	4.04146	2.64783	-8.72804	500
PROMICE	IV_20180809_20180902_vx.tif	2018-08-09	2018-09-02	0.0657084	5.92479	4.78898	2361.26	2.4676	2.57526	-5.33584	500
PROMICE	IV_20180821_20180914_vx.tif	2018-08-21	2018-09-14	0.0657084	4.17533	7.67048	2437.49	2.48277	-2.53163	-3.32027	500
PROMICE	IV_20180902_20180926_vx.tif	2018-09-02	2018-09-26	0.0657084	23.0619	7.69177	2018.86	4.76049	19.4148	12.4466	500
PROMICE	IV_20180926_20181020_vx.tif	2018-09-26	2018-10-20	0.0657084	19.9561	9.63365	2437.5	3.97069	11.4664	16.333	500
PROMICE	IV_20181020_20181113_vx.tif	2018-10-20	2018-11-13	0.0657084	7.90509	9.99249	3687.5	3.48681	-6.96924	-3.73096	500
PROMICE	IV_20181101_20181125_vx.tif	2018-11-01	2018-11-25	0.0657084	3.61764	6.35165	2203.32	2.09427	-2.61168	-2.50328	500
PROMICE	IV_20181113_20181207_vx.tif	2018-11-13	2018-12-07	0.0657084	3.51425	8.27199	3187.51	4.16383	0.857643	3.40799	500
PROMICE	IV_20181126_20181219_vx.tif	2018-11-26	2018-12-19	0.0629706	0.852913	3.55056	1508.11	1.79962	0.237666	0.819131	500
PROMICE	IV_20181207_20181231_vx.tif	2018-12-07	2018-12-31	0.0657084	0.785249	2.16716	1402.11	1.54352	0.557397	-0.553105	500
PROMICE	IV_20181219_20190112_vx.tif	2018-12-19	2019-01-12	0.0657084	0.888009	2.36562	1159.92	1.68803	0.395974	-0.794836	500
PROMICE	IV_20181231_20190124_vx.tif	2018-12-31	2019-01-24	0.0657084	1.39479	3.29131	1603.71	1.33308	-0.316874	1.35832	500
PROMICE	IV_20190112_20190205_vx.tif	2019-01-12	2019-02-05	0.0657084	2.37078	4.67435	2345.38	2.7128	-2.01656	-1.24661	500
PROMICE	IV_20190124_20190217_vx.tif	2019-01-24	2019-02-17	0.0657084	3.02579	3.62939	1535.83	1.81804	0.798796	-2.91845	500
PROMICE	IV_20190205_20190301_vx.tif	2019-02-05	2019-03-01	0.0657084	0.510348	3.92355	2248.22	2.3322	-0.470761	-0.197077	500
PROMICE	IV_20190217_20190313_vx.tif	2019-02-17	2019-03-13	0.0657084	5.85075	5.91005	2553.7	2.26685	0.230539	-5.84621	500
PROMICE	IV_20190301_20190325_vx.tif	2019-03-01	2019-03-25	0.0657084	8.81406	3.14883	1376.15	2.20718	0.495476	-8.80012	500
PROMICE	IV_20190313_20190406_vx.tif	2019-03-13	2019-04-06	0.0657084	1.88268	3.75288	1724.65	1.86775	-0.0727057	1.88128	500
PROMICE	IV_20190325_20190417_vx.tif	2019-03-25	2019-04-17	0.0629706	4.5078	3.17833	1382.54	1.89664	-4.43423	-0.811087	500
PROMICE	IV_20190406_20190430_vx.tif	2019-04-06	2019-04-30	0.0657084	1.1279	3.63085	1800.81	2.60256	1.12686	0.0482731	500
PROMICE	IV_20190418_20190512_vx.tif	2019-04-18	2019-05-12	0.0657084	5.96805	2.6383	1307.42	1.53228	-0.711466	5.92549	500
PROMICE	IV_20190430_20190524_vx.tif	2019-04-30	2019-05-24	0.0657084	3.08795	3.06531	1576.98	1.5644	-0.0555925	-3.08744	500
PROMICE	IV_20190512_20190605_vx.tif	2019-05-12	2019-06-05	0.0657084	4.45373	4.32475	2029.82	2.54526	1.19795	-4.28959	500
PROMICE	IV_20190524_20190617_vx.tif	2019-05-24	2019-06-17	0.0657084	2.68483	2.48851	1424.32	1.39447	-2.47001	-1.05232	500
PROMICE	IV_20190605_20190629_vx.tif	2019-06-05	2019-06-29	0.0657084	2.17518	4.68729	2218.07	2.81688	1.11815	1.86579	500
PROMICE	IV_20190617_20190711_vx.tif	2019-06-17	2019-07-11	0.0657084	4.99818	4.77325	2159.6	2.54361	-2.66014	4.23148	500
PROMICE	IV_20190629_20190723_vx.tif	2019-06-29	2019-07-23	0.0657084	1.99753	2.92679	1411.97	1.46479	0.385891	1.95991	500
PROMICE	IV_20190711_20190804_vx.tif	2019-07-11	2019-08-04	0.0657084	4.40915	4.01063	2137.33	2.83039	-4.40258	-0.240691	500
TSX	TerraSAR-X_vel_AWI_V0.2_vx.tif	2016-09-07	2017-12-23 23:59:59	1.29227	0.515051	0.393944	10.0027	0.393997	-0.302556	0.416818	30
TSX	TerraSAR-X_vel_AWI_V0.2_vx_no_sm.tif	2016-09-07	2017-12-23 23:59:59	1.29227	0.512756	0.388398	10.0073	0.388461	-0.301924	0.41444	30
